# Supplementary material for: Warm beach, warmer turtles: Using drone-mounted thermal infrared sensors to monitor sea turtle nesting activity
Source: Frontiers journal article supplement (doi:10.3389/fcosc.2022.954791), 2022-07-28
Supplement: Table_1.XLSX [file Table_1.XLSX]

## Sheet: Table 1
Table 1. The thermal drone start and landing time for every flight during the study period, daily and nightly temperatures, times and height of the highest and lowest tides, moon percentage and the drone height and gimbal camera angle that was programmed for every flight
Date	Flight #	Start time	End time	Daily		During the patrol		Total	Tides time and height		Moon percentage
				Max temp (°C)	Min temp (°C)	Max temp (°C)	Min temp (°C)	Rainfall (mm)	High	Low	0.97
2021-10-19	1	20:31:00	20:57:00	30.2	24.1	25.3	24.3	7.34	13:42 (3.2 m)	19:59 (0.4 m)
	2	21:22:00	21:48:00
	3	22:34:00	22:59:00
	4	23:30:00	23:56:00
2021-10-20	1	21:58:00	22:20:00	29.9	23.6	25.2	23.9	0	14:22 (3.2 m)	20:36 (0.2 m)	1
	2	22:55:00	23:21:00
	3	23:30:00	23:55:00
	4	00:05:00	00:30:00
2021-11-04	1	20:02:00	20:26:00	29.5	23.3	24.1	23.3	3.4	02:03 (3.5 m)	19:58 (0 m)	0
	2	21:07:00	21:31:00
	3	22:43:00	23:06:00
	4	23:50:00	00:13:00
2021-11-05	1	20:01:00	20:27:00	28.7	23.4	24.9	23.5	4.31	02:48 (3.6 m)	20:44 (-0.2 m)	0.01
	2	21:04:00	21:27:00
	3	22:40:00	23:04:00
	4	23:47:00	00:11:00
	5	00:15:00	00:39:00
2021-11-10	1	21:05:00	:21:28	30.3	23.1	25.1	23.5	1.02	18:48 (3 m)	01:05 (0.5 m)	0.33
	2	22:04:00	22:27:00
	3	23:13:00	:23:37
	4	00:11:00	00:35:00
2021-11-11	1	21:44:00	22:06:00	29.8	23.3	24.9	23.5	0	19:53 (2.9 m)	02:13 (0.6 m)	0.5
	2	23:18:00	23:45:00
	3	00:31:00	00:55:00
	4	01:18:00	01:42:00
2021-11-12	1	23:00:00	23:24:00	30.4	22.9	24.8	22.9	1.52	21:03 (2.8 m)	03:28 (0.8 m)	0.55
	2	00:16:00	00:41:00
	3	01:18:00	01:45:00
	4	02:15:00	02:39:00
	5	03:10:00	03:35:00
