# Supplementary material for: Warm beach, warmer turtles: Using drone-mounted thermal infrared sensors to monitor sea turtle nesting activity
Source: Frontiers journal article supplement (doi:10.3389/fcosc.2022.954791), 2022-07-28
Supplement: Table_2.XLSX [file Table_2.XLSX]

## Sheet: Table 2
	Table 2. Three temperature measurements of the wet sand that has been washed over by the tides, dry sand of the upper section of the beach, sea turtle carapace temperature at different nesting stage (back flipper temperature between brackets), and temperatures of three diifferent tracks
		Temp. 1 (°C)	Temp. 2 (°C)	Temp. 3 (°C)	Average (°C)
	Emerging turtle	26.6 (26.3)	26.2 (27)	27.2 (28.1)	26.7 (27.1)
	Digging turtle	26.8 (28.1)	28 (27.1)	28.5 (26.3)	27.8 (27.2)
	Camouflaging turtle	26.6 (28.4)	26.8 (27.6)	26.8 (26.7)	26.7 (27.6)
	Track on the middle beach section sand	25	23.2	25	24.4
	Track on the upper beach section sand	26.3	23.3	27	25.5333
	Middle beach section sand	24.9	23.8	23.6	24.1
	Upper beach section sand	25.3	24.5	27.2	25.6667
