# Supplementary material for: Warm beach, warmer turtles: Using drone-mounted thermal infrared sensors to monitor sea turtle nesting activity
Source: Frontiers journal article supplement (doi:10.3389/fcosc.2022.954791), 2022-07-28
Supplement: Table_3.XLSX [file Table_3.XLSX]

## Sheet: detections
Table 3. Comparison of the number of detections by our thermal drone and the patrollers across the seven experimental nights. The number of detections are split into the seven categories: i) sea turtle, ii) sea turtle and track, iii) track and/or fresh nestsea turtle nesting events, iv) other wildlife, v) predators, vi) people excluding patrollers, and vii) unidentifed. The 'Total' row and column…
		Night 1	Night 2	Night 3	Night 4	Night 5	Night 6	Night 7	Total
Drone Patrol	i)	0	1	0	0	1	0	0	2
	ii)	0	2	6	6	2	3	7	26
	iii)	0	3	5	6	7	6	5	32
	iv)	2	0	1	3	2	9	8	25
	v)	1	2	2	4	2	1	2	14
	vi)	1	2	0	0	0	0	0	3
	vii)	7	4	1	1	5	1	7	26
	Total	0	6	11	12	10	9	12	60
People Patrol	i)	0	0	0	0	0	0	0	0
	ii)	0	2	7	5	6	3	6	29
	iii)	0	2	2	5	2	3	5	19
	iv)	0	0	0	0	0	0	0	0
	v)	0	0	0	0	0	0	0	0
	vi)	0	0	0	0	0	0	0	0
	vii)	0	0	0	0	0	0	0	0
	Total	0	4	9	10	8	6	11	48
