# Supplementary material for: Warm beach, warmer turtles: Using drone-mounted thermal infrared sensors to monitor sea turtle nesting activity
Source: Frontiers journal article supplement (doi:10.3389/fcosc.2022.954791), 2022-07-28
Supplement: Table_4.XLSX [file Table_4.XLSX]

## Sheet: Suppl. Videos
	Supplementary Video number	Title	YouTube link
	1	Thermal drone monitors olive ridley sea turtle hatchling release	https://youtu.be/-r4at9Lr6tA
	2	Thermal drone detects olive ridley sea at flight height of 4 m	https://youtu.be/JUzUXVSA4hY
	3	Testing drone camera angle gimbal	https://youtu.be/35LRMBYkHD4
	4	Thermal drones detect seven categories of activity on beaches	https://youtu.be/tMn88SQy0Q4
	5	Thermal drone challenges: track detection	https://youtu.be/UV49_MfQkU4
